# Supplementary material
Source: publisher site journal article supplement (https://www.dovepress.com/article/552138)
Supplement: Supplementary file 1 [file 552138%20Revised%20-supplementary-data_1.docx]

**Supplementary Data**

| Group | No. | Read number |
| --- | --- | --- |
| Bacterial infections | 1 | 5 |
| 2 | 1 |
| 3 | 2 |
| 4 | 1 |
| TBM | 1 | 26 |
| 2 | 90 |
| 3 | 14 |
| 4 | 1 |
| 5 | 5 |
| 6 | 3 |
| 7 | 8 |
| 8 | 2 |
| 9 | 8 |
| 10 | 7 |
| 11 | 3 |
| Fungal infections | 1 | 3 |
| 2 | 23 |
| 3 | 14 |
| 4 | 1 |
| 5 | 2 |
| 6 | 5 |
| Viral infections | 1 | 17 |
| 2 | 3 |
| 3 | 3 |
| 4 | 13 |
| 5 | 2 |
| 6 | 14 |
| 7 | 12 |
| 8 | 1701 |
| 9 | 6 |
| CNS non-infections | 1 | 4 |
| 2 | 13 |
| 3 | 5 |
| 4 | 2 |
| 5 | 48 |
| 6 | 1 |
| 7 | 8 |
| 8 | 4 |
| 9 | 6 |
| 10 | 1 |

**Table S1** Reads of EBV detected by mNGS

Abbreviation: EBV, Epstein-Barr virus; mNGS, metagenomic next-generation sequencing; TBM, tuberculous meningitis; CNS, central nervous system

**Table S2** Consistency of mNGS and Culture for Detection in Different Infection Types

|  | Concordant+ | Concordant- | mNGS+/Culture- | mNGS-/Culture+ |
| --- | --- | --- | --- | --- |
| Bacterial infections | 3 | 5 | 19 | 0 |
| TBM | 0 | 20 | 10 | 0 |
| Fungal infections | 11 | 3 | 5 | 1 |

Concordant+: positive for both mNGS and culture; Concordant-: negative for both mNGS and culture.


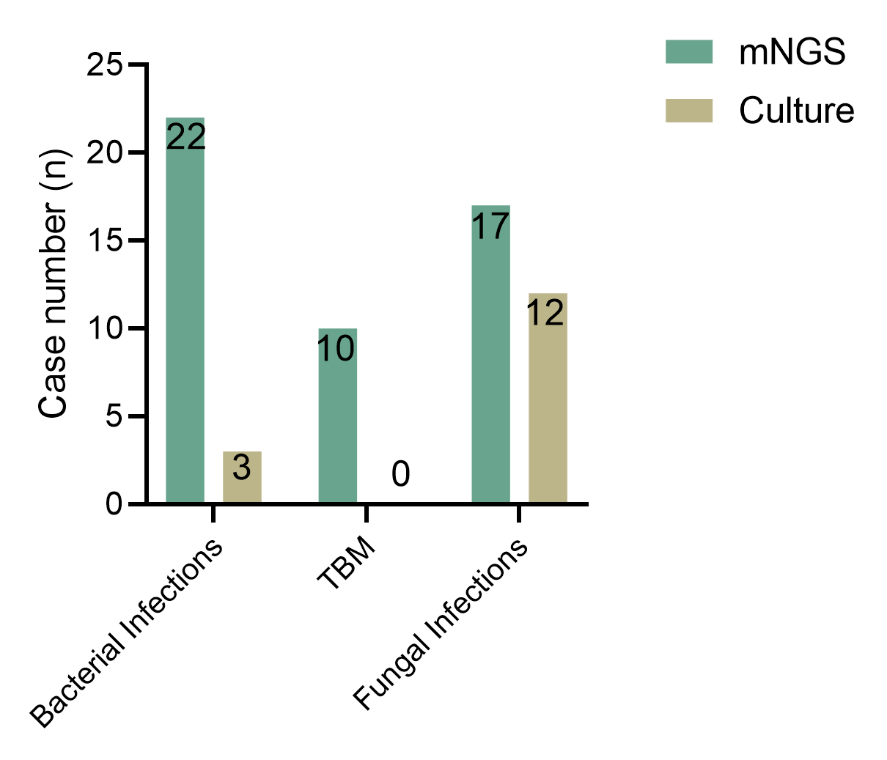


**Figure S1** Comparison of mNGS and Culture Detection in Different Types of Infections. The bar chart shows the number of cases identified for bacterial infections, tuberculous meningitis (TBM), and fungal infections using two diagnostic methods.
